# Supplementary material for: Crystal Growth Promotion and Defects Healing Enable Minimum Open‐Circuit Voltage Deficit in Antimony Selenide Solar Cells
Source: PubMed Central journal article supplement (PMC8948594; doi:10.1002/advs.202105142), 2022-01-28
Supplement: ADVS-9-2105142-s001.pdf [file ADVS-9-2105142-s001.pdf]

## Supporting Information

for *Adv. Sci.*, DOI 10.1002/adv.202105142

Crystal Growth Promotion and Defects Healing Enable Minimum Open-Circuit Voltage Deficit in Antimony Selenide Solar Cells

*Guangxing Liang, Mingdong Chen, Muhammad Ishaq, Xinru Li, Rong Tang, Zhuanghao Zheng, Zhenghua Su, Ping Fan, Xianghua Zhang and Shuo Chen\**

## Supporting Information

for *Adv. Sci.*, DOI: 10.1002/advs.202105142

Crystal Growth Promotion and Defects Healing Enable  
Minimum Open-Circuit Voltage Deficit in Antimony Selenide  
Solar Cells

*Guangxing Liang, Mingdong Chen, Muhammad Ishaq, Xinru Li, Rong Tang,  
Zhuanghao Zheng, Zhenghua Su, Ping Fan, Xianghua Zhang and Shuo Chen\**

## Supporting Information

### Crystal Growth Promotion and Defects Healing Enable Minimum Open-Circuit Voltage Deficit in Antimony Selenide Solar Cells

Guangxing Liang, Mingdong Chen, Muhammad Ishaq, Xinru Li, Rong Tang, Zhuanghao Zheng, Zhenghua Su, Ping Fan, Xianghua Zhang and Shuo Chen\*

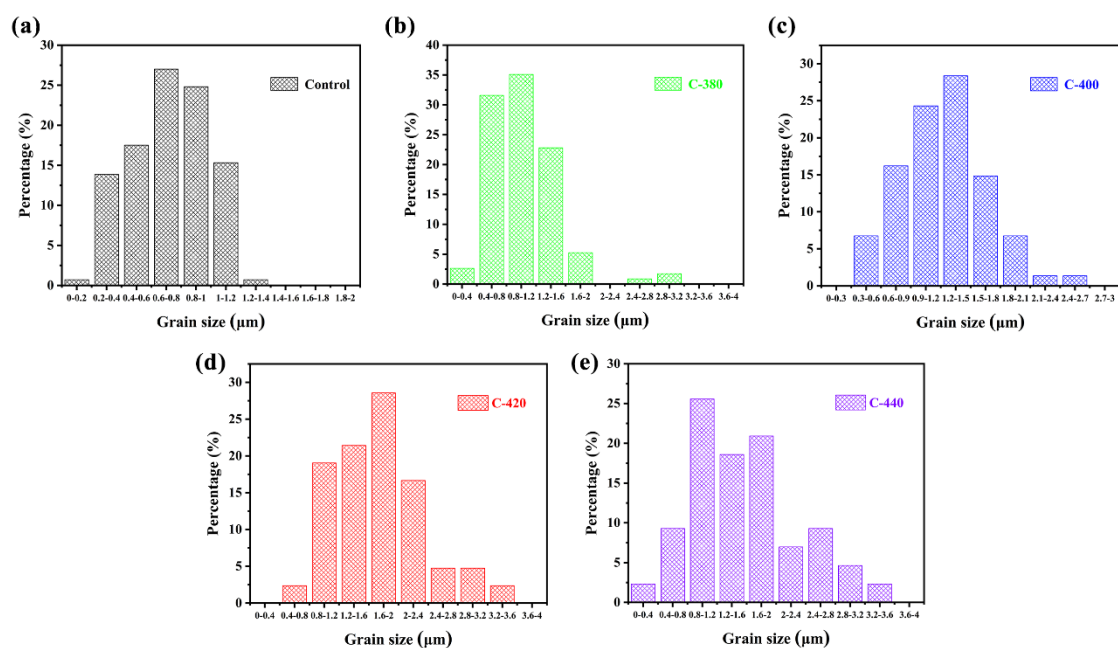

**Figure S1.** Grain size distributions of the  $\text{Sb}_2\text{Se}_3$  thin films with different post-selenization temperatures.

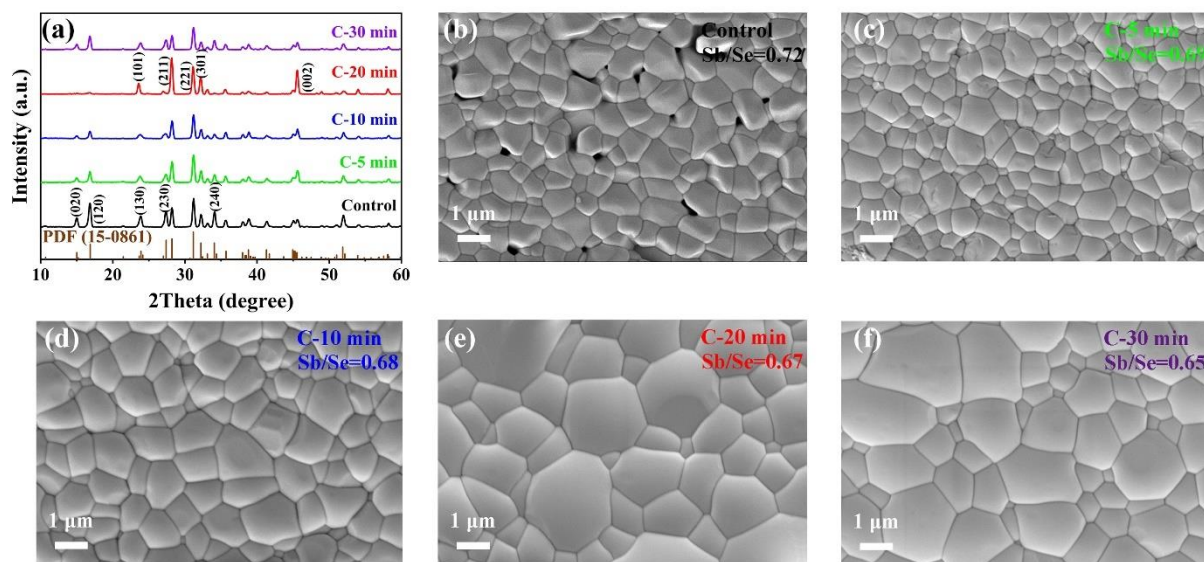

**Figure S2.** (a) XRD patterns, (b-f) top-view SEM images of the  $\text{Sb}_2\text{Se}_3$  thin films with different post-selenization durations, labeled as Control (0 min), C-5 min, C-10 min, C-20 min and C-30 min, respectively.

**Supplementary note 1. DFT calculations**

Density functional theory (DFT) calculations were performed using the Vienna Ab-initio Simulation Package (VASP) software.<sup>[1,2]</sup> The exchange correlation functional was approximated by using the generalized gradient approximation (GGA) with Perdew-Burke-Ernzerhof (PBE) parametrization. The cutoff energy of the plane-wave was set to be 500 eV to ensure convergence. The convergence criteria of the force and the energy were  $10^{-3}$  eV/Å and  $10^{-6}$  eV, respectively. The 3D Brillouin zone integration was done with a k-mesh density of  $100/a$ , where  $a$  denoted the length of the lattice constant in the unit of Å. The Sb-rich  $\text{Sb}_2\text{Se}_3$  was modeled from  $\text{Sb}_8\text{Se}_{11}$  with a Se-vacancy in  $\text{Sb}_2\text{Se}_3$  unit cell (Figure S3a), which was close to the experiment determined Sb/Se ratio of 0.72, and the lattice parameters were  $a = 13.36$  Å,  $b = 4.00$  Å and  $c = 11.41$  Å. Meanwhile, as shown in Figure S3b, the stoichiometric  $\text{Sb}_2\text{Se}_3$  was modeled from  $\text{Sb}_8\text{Se}_{12}$  with optimized lattice parameters of  $a = 12.84$  Å,  $b = 4.03$  Å and  $c = 11.54$  Å for the unit cell.

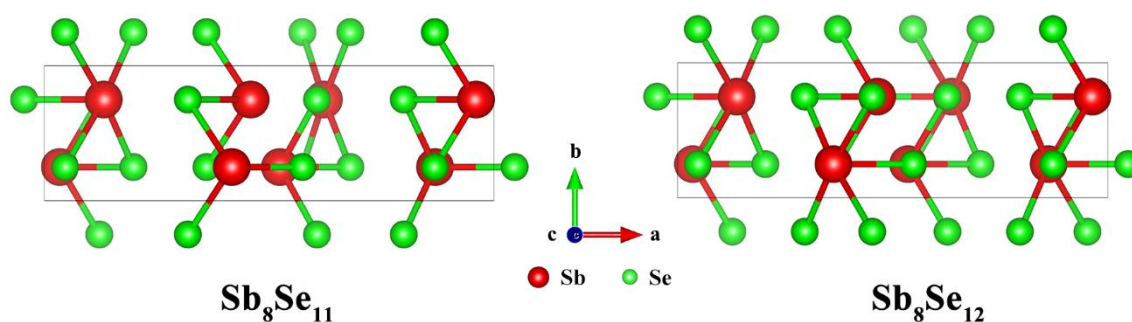

**Figure S3.** The atomic configurations of (a)  $\text{Sb}_8\text{Se}_{11}$ , and (b)  $\text{Sb}_8\text{Se}_{12}$ , used in DFT calculations.

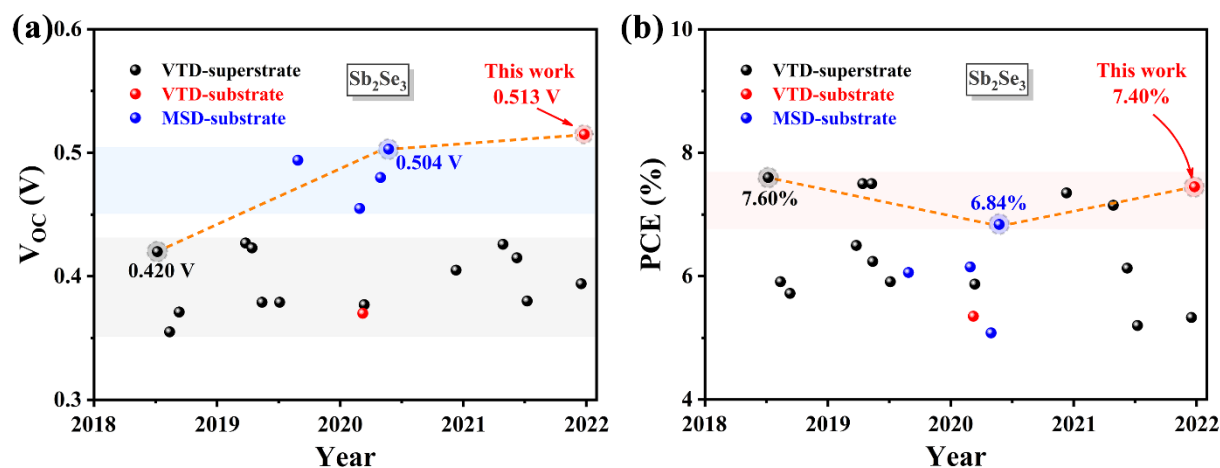

**Figure S4.** (a)  $V_{OC}$ , and (b) PCE statistics of the  $\text{Sb}_2\text{Se}_3$  solar cells prepared by representative VTD and magnetron sputtering deposition (MSD) methods.<sup>[3-20]</sup> The dashed circle marked black, red, and blue points represent the champion PCE and corresponding  $V_{OC}$  of the VTD processed superstrate, VTD processed substrate, and MSD processed substrate  $\text{Sb}_2\text{Se}_3$  solar cells, respectively.

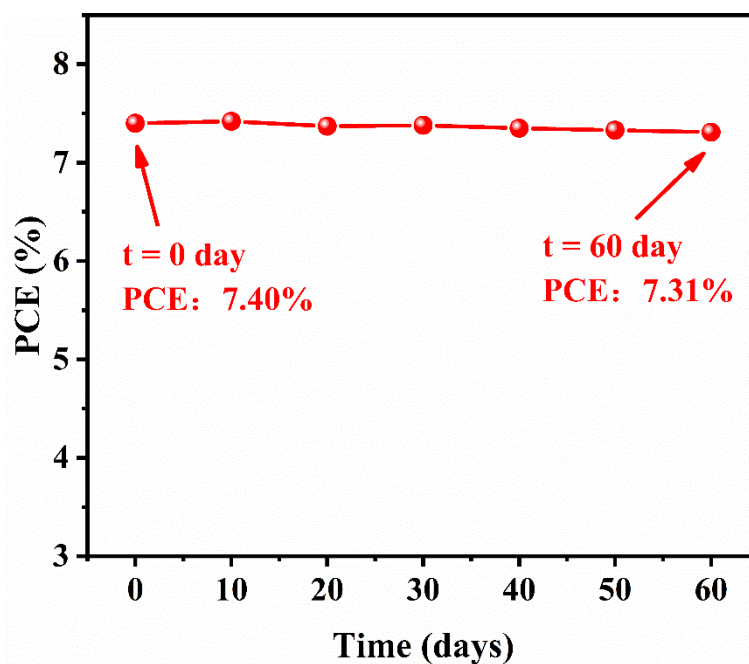

**Figure S5.** PCE evolution of the C-420 device after 60 days storage in ambient air without special encapsulation.

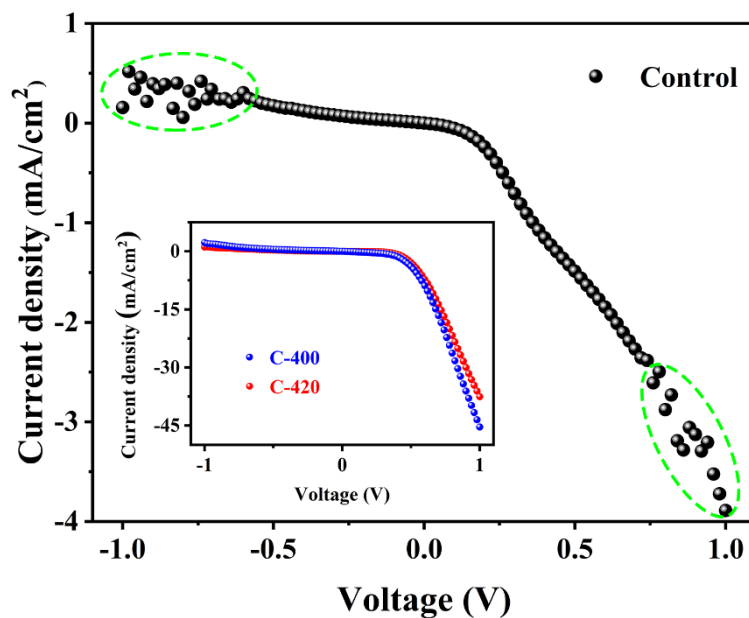

**Figure S6.**  $J-V$  curve of the Control device measured in dark condition, covering voltage range from  $-1$  V to  $1$  V.  $J-V$  curves of the C-400 and C-420 devices obtained at the same condition are inset in the upper right corner for comparison.

**Supplementary note 2. Ultraviolet photoelectron spectroscopy**

Ultraviolet photoelectron spectroscopy (UPS) was carried out to investigate the band structure of Control (Sb-rich) and C-420 (Se-rich)  $\text{Sb}_2\text{Se}_3$  thin films, including the conduction band ( $E_C$ ), valence band ( $E_V$ ) and Fermi level ( $E_F$ ). According to the secondary electron cut-off (SEC) edge and valence band (VB) position (Figure S7a and b), the  $E_F$  were determined as  $-4.41$  and  $-4.66$  eV for Control  $\text{Sb}_2\text{Se}_3$  and C-420  $\text{Sb}_2\text{Se}_3$ , respectively. Combined with their optical bandgap ( $E_g$ ) values,  $E_C$  and  $E_V$  of the Control sample were calculated as  $-3.98$  and  $-5.12$  eV, whereas showed a slight up-shift to  $-3.92$  and  $-5.08$  eV for C-420 sample. Thus, an obvious transition of the conductive type from n-type to p-type can be observed, which was closely related to the chemical composition evolution after post-selenization heat treatment of the  $\text{Sb}_2\text{Se}_3$  thin film.

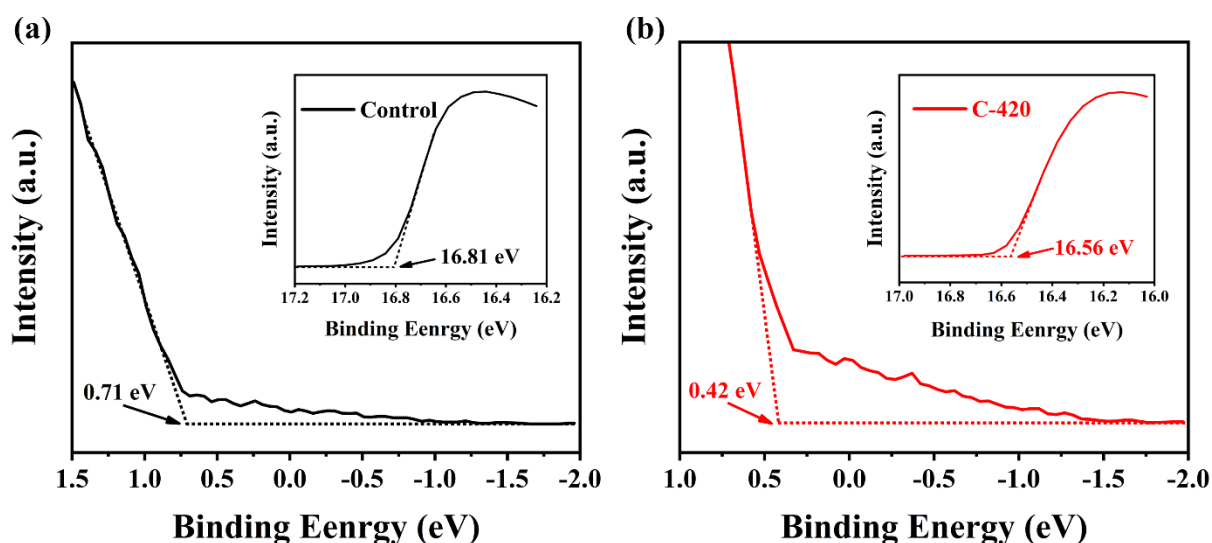

**Figure S7.** UPS characterizations: secondary electron cut-off (SEC) edge and valence band (VB) position of the Control (a), and C-420 (b)  $\text{Sb}_2\text{Se}_3$  thin films.



### Supplementary note 3. Background of DLTS measurements

Herein, deep-level transient spectroscopy (DLTS) was conducted to analyze the deep defects in the  $\text{Sb}_2\text{Se}_3$  absorber layer of Control and C-420 devices. Arrhenius plots obtained from defect peaks in DLTS signal are shown in Figure 7b. The active energy ( $E_A$ ,  $E_C-E_T$  or  $E_T-E_V$ ) and capture cross section ( $\sigma$ ) of electron and hole defects can be calculated from the Arrhenius plots according to the following equations<sup>[21]</sup>

$$\ln(\tau_e v_{\text{th},n} N_C) = \frac{E_C-E_T}{k_B T} - \ln(X_n \sigma_n) \quad (1)$$

$$\ln(\tau_e v_{\text{th},p} N_V) = \frac{E_T-E_V}{k_B T} - \ln(X_p \sigma_p) \quad (2)$$

where  $\tau_e$ ,  $N_C$ ,  $N_V$ ,  $E_C$ ,  $E_V$  and  $E_T$  are emission time constant, conduction band state density, valence band state density, conduction band, valence band, and trap energy level, respectively.  $X_n$  and  $X_p$  are the entropy factor of hole and electron,  $\sigma_n$  and  $\sigma_p$  represent the capture cross-section of electron and hole defects, respectively.  $T$  and  $k_B$  are the temperature and Boltzmann constant, respectively.  $v_{\text{th},n}$  and  $v_{\text{th},p}$  are the thermal velocities associated with electron and hole defects. The  $v_{\text{th},n}$  and  $N_C$  can be obtained by following equations

$$v_{\text{th},n} = \sqrt{\frac{3kT}{m_n^*}} \quad (3)$$

$$N_C = 2 \left( \frac{2\pi m_n^* kT}{h^2} \right)^{\frac{3}{2}} \quad (4)$$

where  $m_n^*$  is the effective mass for electrons, with similar equations for  $v_{\text{th},p}$  and  $N_V$ . The activation energy of electron ( $E_C-E_T$ ) and hole ( $E_T-E_C$ ) traps were obtained from the slopes of equations (2) and (3) through linear regression.  $\sigma_n$  and  $\sigma_p$  values can be extracted from the intersection with y-axis. Defect concentration ( $N_T$ ) can be obtained from following equations<sup>[22]</sup>

$$N_T = 2N_S \frac{\Delta C}{C_R} \quad (5)$$

$$N_S = \frac{2C^2}{q\epsilon A^2} (V + V_d) \quad (6)$$

where  $N_T$  and  $N_S$  represents the trap density and the shallow dopant concentration,

respectively.  $C_R$  is the capacitance under reverse bias, and  $\Delta C$  is the amplitude of capacitance transient.  $V$  and  $V_d$  are the applied voltage and diffusion voltage, respectively.

**Table S1.** Fitted parameters for transient kinetic traces of the Control and C-420. The average lifetime  $\tau$  was calculated according to the equation:  $\tau = (A_1\tau_1^2 + A_2\tau_2^2)/(A_1\tau_1 + A_2\tau_2)$ .

| Sample  | $A_1$ | $\tau_1$ (ps) | $A_2$ | $\tau_2$ (ps) | $\tau$ (ps) |
|---------|-------|---------------|-------|---------------|-------------|
| Control | 0.79  | 349           | 0.21  | 3548          | 2684        |
| C-420   | 0.53  | 487           | 0.47  | 15010         | 14497       |

**Table S2.** A comparison of TAS measured carrier lifetime ( $\tau$ ) of antimony chalcogenides.

| Materials                           | Preparation         | Substrate | $\tau$ (ps) | Method | Ref.      |
|-------------------------------------|---------------------|-----------|-------------|--------|-----------|
| Sb <sub>2</sub> S <sub>3</sub>      | Solution            | Glass     | 23000       | TAS    | [23]      |
|                                     | Thermal evaporation | FTO       | 18700       | TAS    | [24]      |
| Sb <sub>2</sub> Se <sub>3</sub>     | VTD                 | CdS       | 1339        | TAS    | [3]       |
|                                     | Solution            | FTO       | 6235        | TAS    | [25]      |
|                                     | VTD-Se              | Glass     | 14497       | TAS    | This work |
| Sb <sub>2</sub> (S,Se) <sub>3</sub> | Hydrothermal        | FTO       | 10604       | TAS    | [21]      |
|                                     | Hydrothermal        | FTO       | 9546        | TAS    | [26]      |

## References

- [1] A. Stoliaroff, A. Lecomte, O. Rubel, S. Jobic, X. Zhang, C. Latouche, X. Rocquefelte, *ACS Appl. Energy Mater.* **2020**, *3*, 2496.
- [2] Z. Cai, C.-M. Dai, S. Chen, *Sol. RRL* **2020**, *4*, 1900503.
- [3] X. Wen, C. Chen, S. Lu, K. Li, R. Kondrotas, Y. Zhao, W. Chen, L. Gao, C. Wang, J. Zhang, G. Niu, J. Tang, *Nat. Commun.* **2018**, *9*, 2179.
- [4] J. Zhang, R. Kondrotas, S. Lu, C. Wang, C. Chen, J. Tang, *Sol. Energy* **2019**, *182*, 96.
- [5] K. Li, S. Wang, C. Chen, R. Kondrotas, M. Hu, S. Lu, C. Wang, W. Chen, J. Tang, *J. Mater. Chem. A* **2019**, *7*, 9665.
- [6] H. Guo, X. Jia, S. H. Hadke, J. Zhang, W. Wang, C. Ma, J. Qiu, N. Yuan, L. H. Wong, J. Ding, *J. Mater. Chem. C* **2020**, *8*, 17194.
- [7] X. Wen, Z. Lu, G.-C. Wang, M. A. Washington, T.-M. Lu, *Nano Energy* **2021**, *85*, 106019.

- [8] X. Hu, J. Tao, Y. Wang, J. Xue, G. Weng, C. Zhang, S. Chen, Z. Zhu, J. Chu, *Appl. Mater. Today* **2019**, *16*, 367.
- [9] K. Li, F. Li, C. Chen, P. Jiang, S. Lu, S. Wang, Y. Lu, G. Tu, J. Guo, L. Shui, Z. Liu, B. Song, J. Tang, *Nano Energy* **2021**, *86*, 106101.
- [10] R. Tang, Z.-H. Zheng, Z.-H. Su, X.-J. Li, Y.-D. Wei, X.-H. Zhang, Y.-Q. Fu, J.-T. Luo, P. Fan, G.-X. Liang, *Nano Energy* **2019**, *64*, 103929.
- [11] Y.-D. Luo, R. Tang, S. Chen, J.-G. Hu, Y.-K. Liu, Y.-F. Li, X.-S. Liu, Z.-H. Zheng, Z.-H. Su, X.-F. Ma, P. Fan, X.-H. Zhang, H.-L. Ma, Z.-G. Chen, G.-X. Liang, *Chem. Eng. J.* **2020**, *393*, 124599.
- [12] G.-X. Liang, Y.-D. Luo, S. Chen, R. Tang, Z.-H. Zheng, X.-J. Li, X.-S. Liu, Y.-K. Liu, Y.-F. Li, X.-Y. Chen, Z.-H. Su, X.-H. Zhang, H.-L. Ma, P. Fan, *Nano Energy* **2020**, *73*, 104806.
- [13] W. Wang, Z. Cao, H. Wang, J. Luo, Y. Zhang, *J. Mater. Chem. A* **2021**, *9*, 26963.
- [14] X. Hu, J. Tao, S. Chen, J. Xue, G. Weng, Kaijiang, Z. Hu, J. Jiang, S. Chen, Z. Zhu, J. Chu, *Sol. Energy Mater. Sol. Cells* **2018**, *187*, 170.
- [15] J. Tao, X. Hu, J. Xue, Y. Wang, G. Weng, S. Chen, Z. Zhu, J. Chu, *Sol. Energy Mater. Sol. Cells* **2019**, *197*, 1.
- [16] C. Wang, S. Lu, S. Li, S. Wang, X. Lin, J. Zhang, R. Kondrotas, K. Li, C. Chen, J. Tang, *Nano Energy* **2020**, *71*, 104577.
- [17] J. Kim, S. Ji, Y. Jang, G. Jeong, J. Choi, D. Kim, S.-W. Nam, B. Shin, *Sol. RRL* **2021**, *5*, 2100327.
- [18] J. Tao, X. Hu, Y. Guo, J. Hong, K. Li, J. Jiang, S. Chen, C. Jing, F. Yue, P. Yang, C. Zhang, Z. Wu, J. Tang, J. Chu, *Nano Energy* **2019**, *60*, 802.
- [19] Q. Cang, H. Guo, X. Jia, H. Ning, C. Ma, J. Zhang, N. Yuan, J. Ding, *Sol. Energy* **2020**, *199*, 19.
- [20] G. Liang, X. Chen, R. Tang, Y. Liu, Y. Li, P. Luo, Z. Su, X. Zhang, P. Fan, S. Chen, *Sol. Energy Mater. Sol. Cells* **2020**, *211*, 110530.
- [21] R. Tang, X. Wang, W. Lian, J. Huang, Q. Wei, M. Huang, Y. Yin, C. Jiang, S. Yang, G. Xing, S. Chen, C. Zhu, X. Hao, M. A. Green, T. Chen, *Nat. Energy* **2020**, *5*, 587.
- [22] Y. Zhao, S. Yuan, D. Kou, Z. Zhou, X. Wang, H. Xiao, Y. Deng, C. Cui, Q. Chang, S. Wu, *ACS Appl. Mater. Interfaces* **2020**, *12*, 12717.
- [23] Z. Yang, X. Wang, Y. Chen, Z. Zheng, Z. Chen, W. Xu, W. Liu, Y. Yang, J. Zhao, T. Chen, H. Zhu, *Nat. Commun.* **2019**, *10*, 4540.
- [24] W. Lian, C. Jiang, Y. Yin, R. Tang, G. Li, L. Zhang, B. Che, T. Chen, *Nat. Commun.* **2021**, *12*, 3260.

[25] Y. Ma, B. Tang, W. Lian, C. Wu, X. Wang, H. Ju, C. Zhu, F. Fan, T. Chen, *J. Mater. Chem. A* **2020**, 8, 6510.

[26] Y. Zhao, S. Wang, C. Jiang, C. Li, P. Xiao, R. Tang, J. Gong, G. Chen, T. Chen, J. Li, X. Xiao, *Adv. Energy Mater.* **2021**, 2103015.
